# Supplementary material
Source: publisher figshare collection journal article supplement (https://tandf.figshare.com/articles/dataset/_/11603802)

## Supplementary Figure 4

A

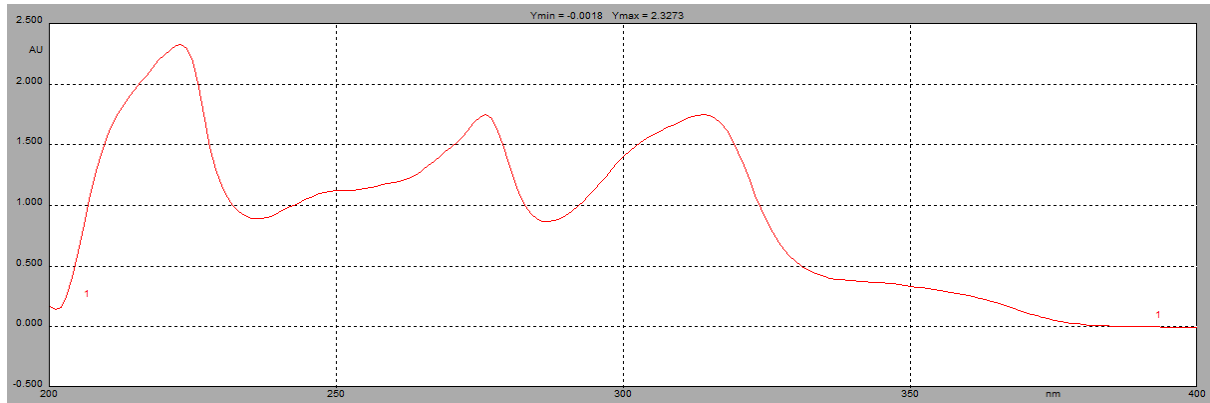

B

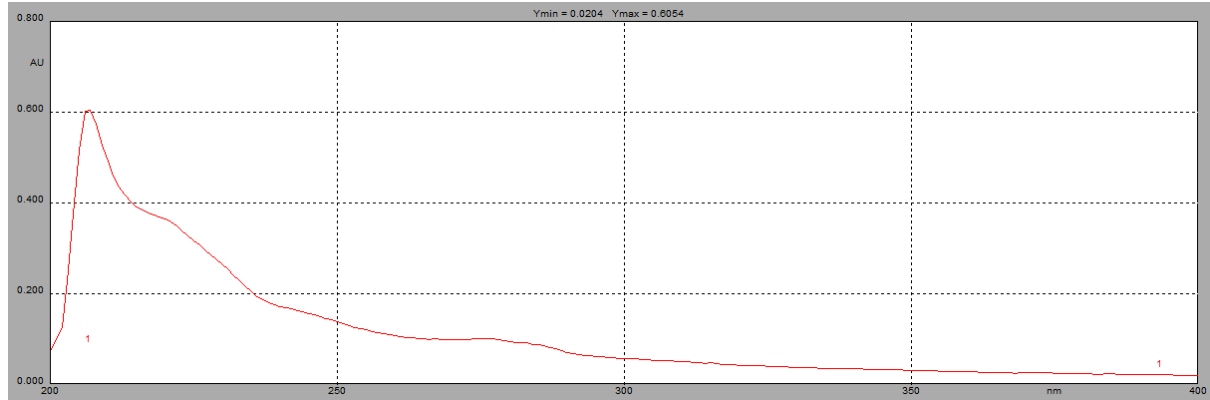

C

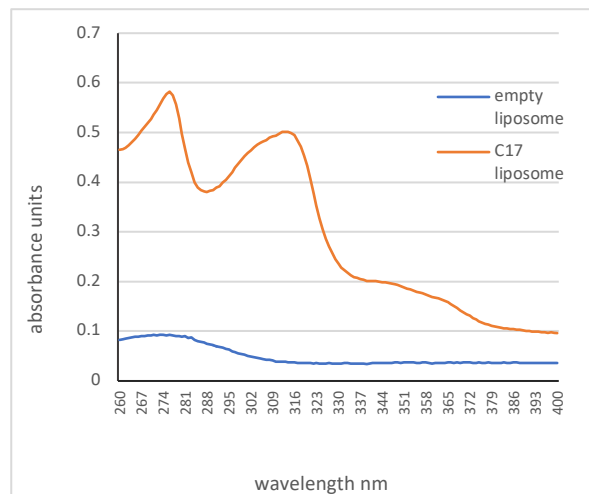

Supplement: Supplementary file [file 1]
